# Supplementary material for: Protein separations via thermally responsive ionic block copolymer brush layers
Source: Royal Society of Chemistry journal article supplement (doi:10.1039/c6ra01061j), 2016-01-01
Supplement: c6ra01061j1.pdf [file c6ra01061j1.pdf]

*Electronic Supplementary Information*

**Protein Separations *via* Thermally Responsive Ionic Block  
Copolymer Brush Layers**

Kenichi Nagase\*,<sup>a</sup> Jun Kobayashi,<sup>a</sup> Akihiko Kikuchi,<sup>b</sup> Yoshikatsu Akiyama,<sup>a</sup>

Hideko Kanazawa,<sup>c</sup> and Teruo Okano\*,<sup>a</sup>

<sup>a</sup> Institute of Advanced Biomedical Engineering and Science, Tokyo Women's Medical University, TWIns,  
8-1 Kawadacho, Shinjuku, Tokyo 162-8666, Japan

<sup>b</sup> Department of Materials Science and Technology, Tokyo University of Science, 6-3-1 Niijuku,  
Katsushika, Tokyo 125-8585, Japan

<sup>c</sup> Faculty of Pharmacy, Keio University, 1-5-30 Shibakoen, Minato, Tokyo 105-8512, Japan

\*Corresponding author

E-mail: nagase.kenichi@twmu.ac.jp, tokano@twmu.ac.jp

**Table S1** Properties of adenosine nucleotides and hydrophobic steroids

| Compounds                        | Structure                                                                           | Molecular weight | LogP <sup>a</sup> | pK        |
|----------------------------------|-------------------------------------------------------------------------------------|------------------|-------------------|-----------|
| Adenosine monophosphate<br>(AMP) | 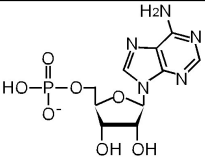   | 347.06           |                   | 3.3, 6.1  |
| Adenosine diphosphate<br>(ADP)   |    | 427.20           |                   | 3.95, 6.3 |
| Adenosine triphosphate<br>(ATP)  |    | 507.18           |                   | 4.00, 6.5 |
| Hydrocortisone                   |   | 362.46           | 1.61              |           |
| Dexamethasone                    |  | 392.46           | 1.83              |           |

a) Partition coefficient in an n-octanol/water system.<sup>S35</sup>

**Table S2** Properties of proteins in milk serum

| Analyte                    | Molecular weight <sup>a)</sup> | pI <sup>a)</sup> | Remarks                                                    |
|----------------------------|--------------------------------|------------------|------------------------------------------------------------|
| $\alpha$ -Lactalbumin      | 14.2 kDa                       | 4.5              | Major protein in milk serum, Related to production lactose |
| $\beta$ -Lactoglobulin     | ~18.4 kDa                      | 5.1              | Major whey protein, Allergic property                      |
| Lactoferrine               | 83.1 kDa                       | 8.2-8.9          | Transferrin family, Antimicrobial activity                 |
| Bovine serum albumin (BSA) | 66.4 kDa                       | 4.7              | Regulation of colloidal pressure of blood                  |
| $\gamma$ -globulin         | 155 kDa                        | 6.85             | Main protein for immunoreaction                            |

a) From manufacturer's data.

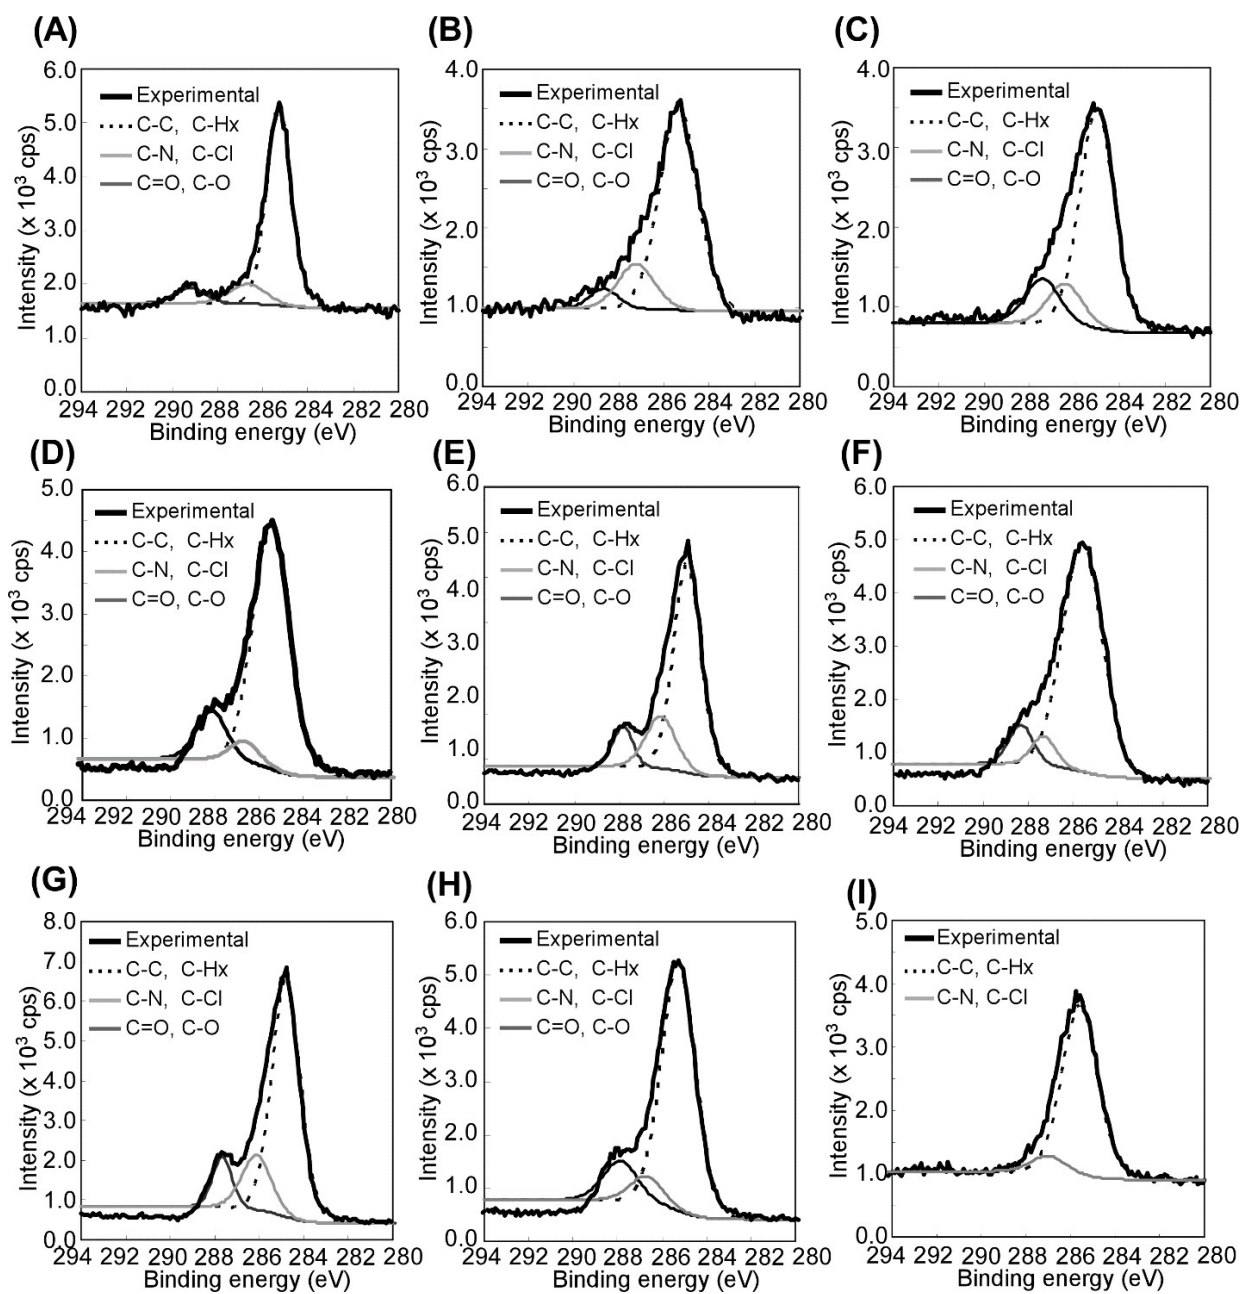

**Figure S1** Peak de-convolution of C1s peaks in X-ray photoelectron spectra of prepared beads (A) 10A, (B) 15A, (C) 20C, (D) 10A-1000IP, (E) 15A-1000IP, (F) 20A-1000IP, (G) 1000IP-*r*-15A, (H) 1000IP, and (I) ATRP-initiator modified silica beads (see Table 3). For copolymer-grafted silica bead surfaces, an additional peak was observed at 288 eV that corresponds to C=O and C-O bonds of the copolymer. There were no peaks in the spectrum of the ATRP-initiator-modified silica surfaces.

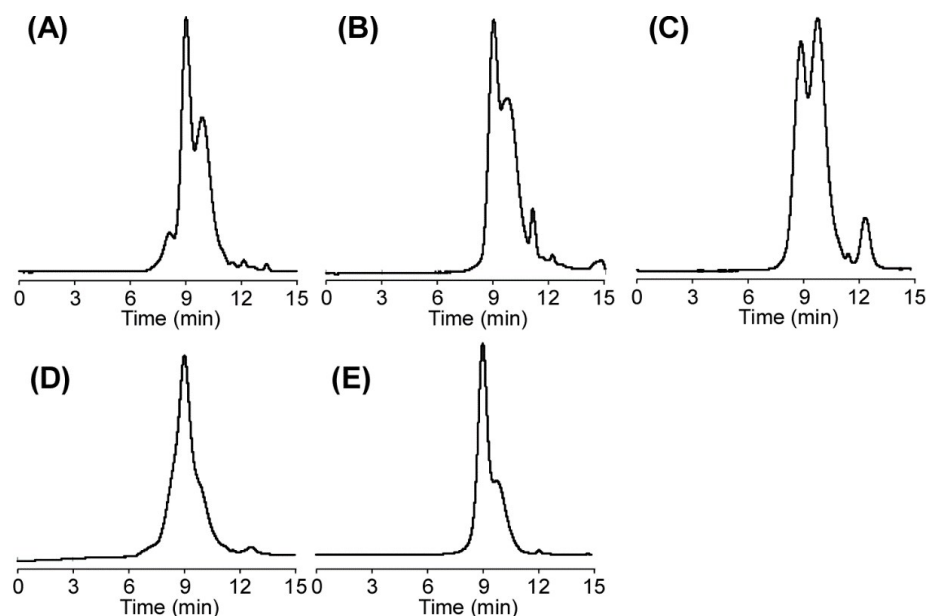

**Figure S2** Gel permeation chromatograms of PAPTAC-*b*-PIPAAM retrieved from silica bead surfaces to determine molecular weights: (A) 10A-1000IP, (B) 15A-1000IP, (C) 20A-1000IP, (D) 1000IP-*r*-15A, and (E) 1000IP (see Table 3).

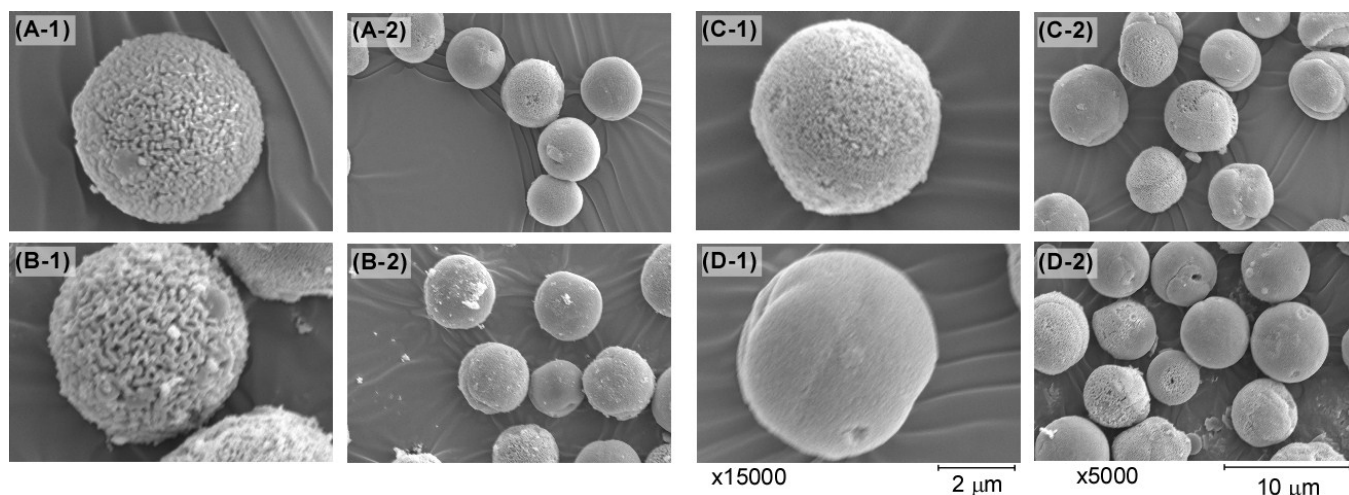

**Figure S3** (A-1, A-2) Scanning electron microscopy (SEM) images of non-modified silica beads; (B-1, B-2) SEM images of initiator-modified silica beads; (C-1, C-2) SEM images of PAPTAC brush-modified beads (15A in Table 1); (D-1, D-2) SEM images of PAPTAC-*b*-PIPAAM brush-grafted silica beads (15A-1000IP in Table 1). Background patterns in the images are double-sided tape that was used to affix the samples to stages. Images numbered (A-1), (B-1), (C-1), and (D-1) are high-resolution ( $\times 15\,000$  magnification).

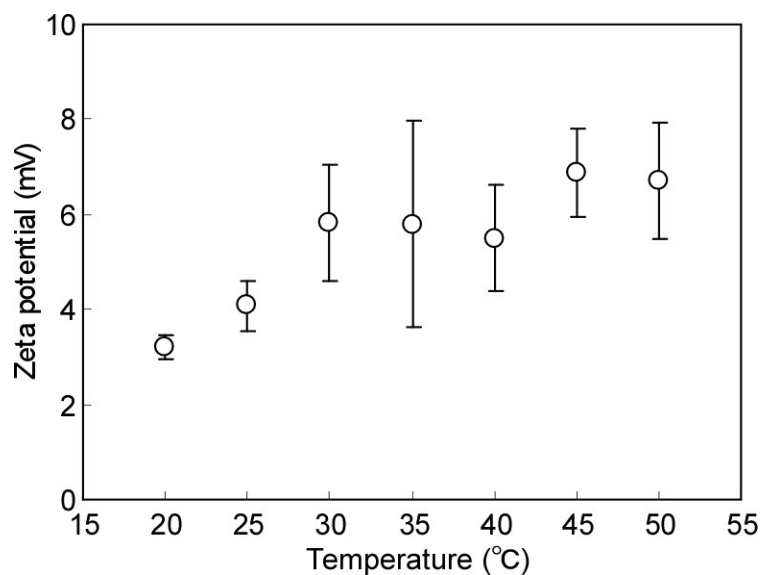

**Figure S4** Zeta potential of the PAPTAC-*b*-PIPAAm brush-grafted silica beads (15A-1000IP in Table 1) at various temperatures in a 5 mM KCl aqueous solution.

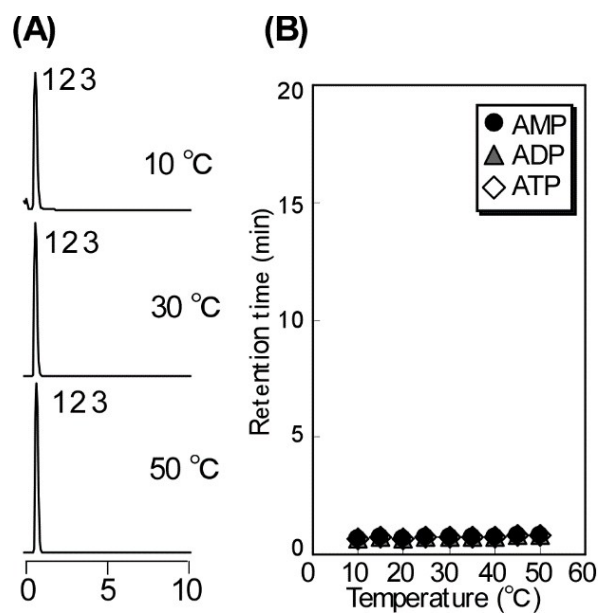

**Figure S5** Elution of adenosine nucleotides from a PI1000 column at various temperatures (A), and temperature-dependent retention times of adenosine nucleotides on PI1000 (B). Mobile phase is 66.7 mmol/L PB (pH 7.0). Peak 1 represents AMP; 2, ADP; 3, ATP.

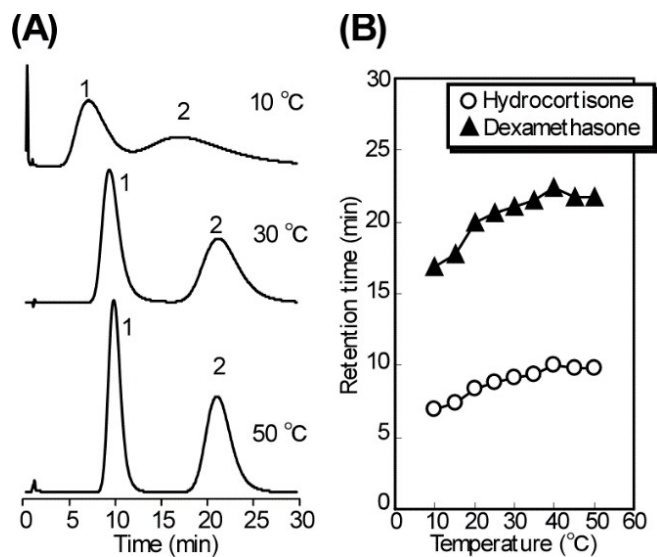

**Figure S6** Elution of steroids from a PI1000 column at various temperatures (A), and temperature-dependent retention times for steroids on PI1000 (B). Mobile phase is 66.7 mmol/L PB (pH 7.0). Peak 1 represents hydrocortisone; 2, dexamethasone.

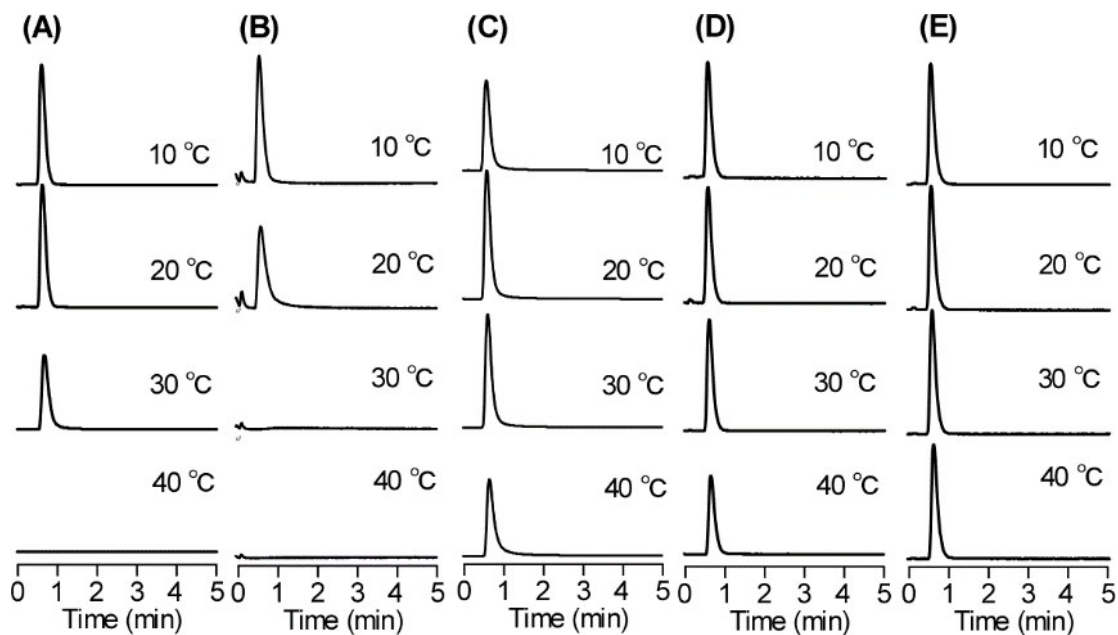

**Figure S7** Temperature-dependent elution of milk serum proteins from a 10A-1000IP column; (A)  $\alpha$ -lactalbumin, (B)  $\beta$ -lactoglobulin, (C) lactoferrin, (D) bovine serum albumin, and (E)  $\gamma$ -globulin. Mobile phase is 66.7 mmol/L PB (pH 7.0).

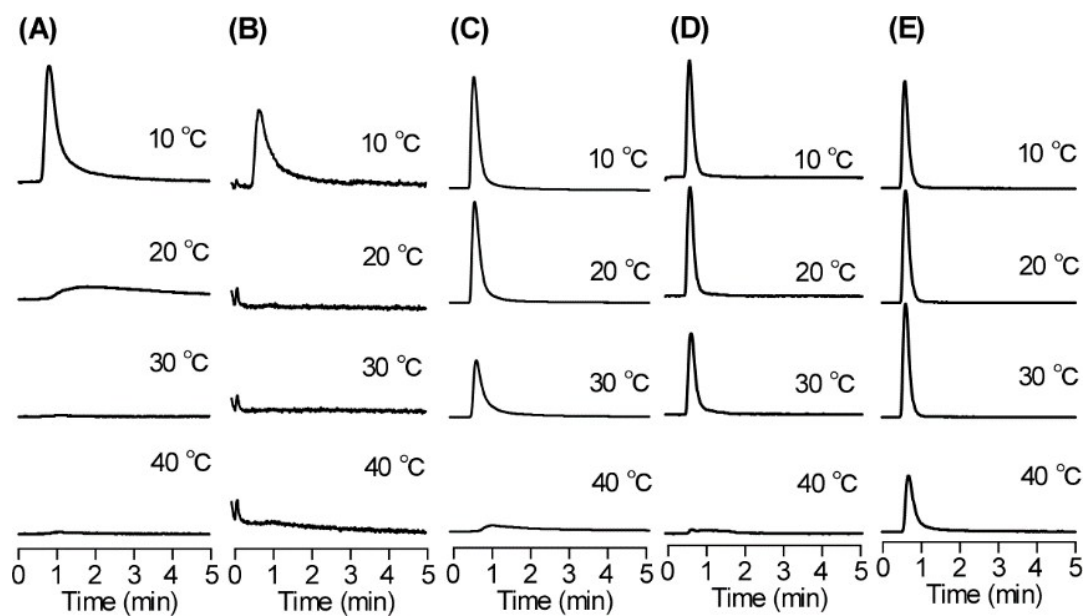

**Figure S8** Temperature-dependent elution of milk serum proteins from a 20A-1000IP column; (A)  $\alpha$ -lactalbumin, (B)  $\beta$ -lactoglobulin, (C) lactoferrin, (D) bovine serum albumin, and (E)  $\gamma$ -globulin. Mobile phase is 66.7 mmol/L PB (pH 7.0).

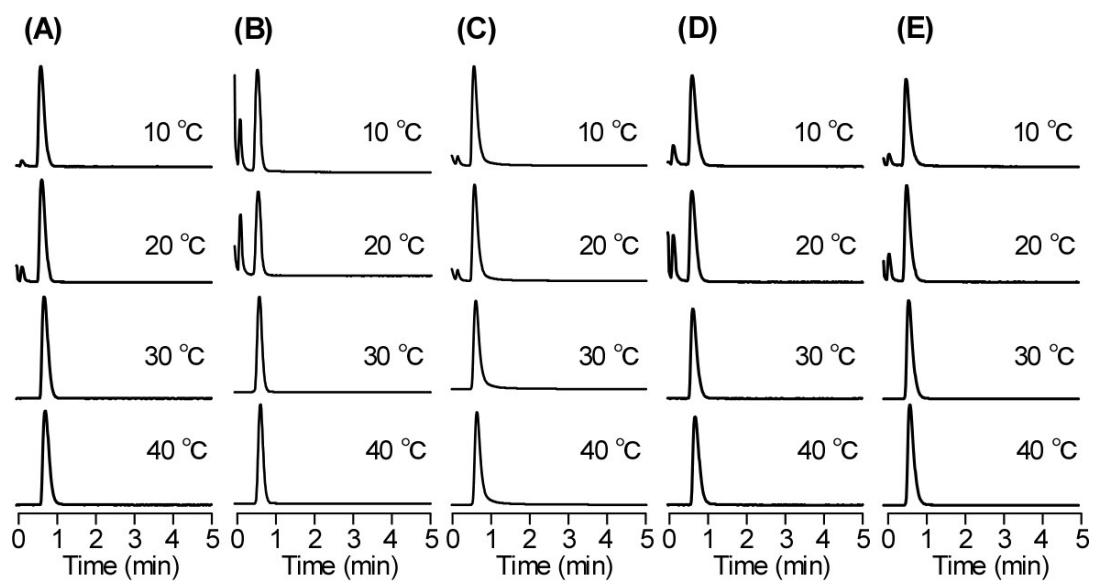

**Figure S9** Temperature-dependent elution of milk serum proteins from a 1000IP column; (A)  $\alpha$ -lactalbumin, (B)  $\beta$ -lactoglobulin, (C) lactoferrin, (D) bovine serum albumin, and (E)  $\gamma$ -globulin. Mobile phase is 66.7 mmol/L PB (pH 7.0).

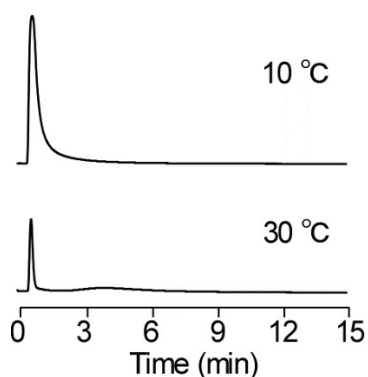

**Figure S10** Temperature-dependent elution of a mixture of milk serum proteins from 15A-1000IP column. Mobile phase is 66.7 mmol/L PB (pH 7.0).

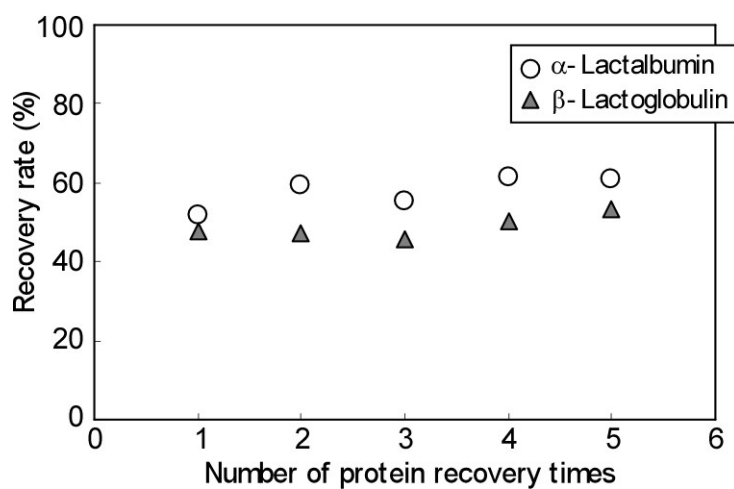

**Figure S11** Recovery rates for proteins with multiple thermally-modulated protein adsorption and desorption steps.

**Reference (S1)** Hansch, C.; Albert, L.; Hoekman, D., *In Exploring QSAR: Hydrophobic, Electronic and Steric Constant* American Chemical Society: Washinton DC, **1995**; p.174, 178.
